# Supplementary material for: An explorative study on systematic assessment of QOL and care needs with the CARES-SF in the early follow-up of patients with digestive cancer
Source: Springer Nature journal article supplement (doi:10.1007/s00520-018-4565-7), 2018-11-29
Supplement: MOESM1 [file 16304420]

**Supplementary file**

TABLE S1. Number of participants with problem rating and desire for help at start of treatment (T0).

|  | **Patients’ problem rating and desire for help (N=46)a** | | | | | | | |
| --- | --- | --- | --- | --- | --- | --- | --- | --- |
| **CARES-SF items** | **0** | **1** | **2** | **3** | **4** | **Meanb** | **Nob** | **Yesb** |
| 1.Diff. bend or lift | 24 | 15 | 6 | 0 | 1 | 1.41 | 34 | 2 |
| 4.Reduction in energy | 7 | 17 | 13 | 7 | 2 | 1.85 | 33 | 4 |
| 6.Diff. household chores | 20 | 16 | 6 | 3 | 1 | 1.58 | 30 | 8 |
| 7.Diff. bathe. brush. groom | 36 | 9 | 1 | 0 | 0 | 1.10 | 35 | 0 |
| 12.Diff. planning active. | 14 | 20 | 9 | 1 | 2 | 1.53 | 36 | 2 |
| 13.Cannot gain weight | 25 | 7 | 5 | 5 | 3 | 2.20 | 31 | 4 |
| 85.Gain too much weight | 39 | 5 | 0 | 0 | 0 | 1.00 | 29 | 1 |
| 15.Food unappealing | 27 | 8 | 5 | 4 | 1 | 1.89 | 29 | 3 |
| 87.Fequent diarrhea | 21 | 15 | 3 | 3 | 3 | 1.75 | 29 | 3 |
| 88.Poor bladder control | 35 | 9 | 2 | 0 | 0 | 1.18 | 31 | 1 |
| 19.Cancer interferes work | 13 | 11 | 11 | 4 | 3 | 1.97 | 28 | 3 |
| 20.Frequently has pain | 19 | 17 | 8 | 2 | 0 | 1.44 | 30 | 3 |
| 25.Clothes not fit | 30 | 8 | 6 | 1 | 1 | 1.69 | 32 | 1 |
| 28.Doctors don’t explain what do | 41 | 4 | 1 | 0 | 0 | 1.20 | 32 | 1 |
| 30.Diff. ask doctors questions | 38 | 5 | 3 | 0 | 0 | 1.38 | 31 | 1 |
| 34.Diff. understand doctors’ explanation | 34 | 9 | 2 | 0 | 0 | 1.18 | 32 | 1 |
| 36.Wants more control over doctor | 35 | 10 | 0 | 0 | 1 | 1.27 | 31 | 1 |
| 40.Uncomfor. with body changes | 15 | 17 | 8 | 4 | 1 | 1.63 | 31 | 3 |
| 41.Frequently anxious | 24 | 13 | 7 | 1 | 1 | 1.55 | 30 | 2 |
| 41b. Frequently lonely | 36 | 5 | 4 | 1 | 1 | 1.82 | 32 | 1 |
| 46.Diff. sleep | 18 | 14 | 8 | 4 | 1 | 1.70 | 30 | 4 |
| 47.Diff. concentrating | 21 | 15 | 5 | 1 | 2 | 1.57 | 29 | 3 |
| 54.Diff. ask frnd/rel. help | 21 | 13 | 9 | 1 | 2 | 1.68 | 31 | 1 |
| 55.Diff. tell frnd/rel. about cancer | 31 | 9 | 3 | 2 | 1 | 1.67 | 32 | 0 |
| 57.Frnd/rel. say look well when not | 29 | 11 | 4 | 1 | 1 | 1.53 | 321 | 0 |
| 60.Frnd/rel. do not visit enough | 38 | 6 | 2 | 0 | 0 | 1.25 | 32 | 0 |
| 63.Frnd/rel. diff. talk about cancer | 30 | 11 | 5 | 0 | 0 | 1.31 | 33 | 0 |
| 63b. Worry how loved ones are coping | 16 | 14 | 12 | 3 | 1 | 1.70 | 31 | 4 |
| 66.Nervous wait to see doctor | 17 | 22 | 4 | 1 | 2 | 1.41 | 32 | 1 |
| 69.Nervous get blood drawn | 35 | 9 | 1 | 1 | 0 | 1.27 | 32 | 0 |
| 71.Worry whether cancer progress | 3 | 19 | 11 | 6 | 7 | 2.02 | 29 | 5 |
| 72.Worry not able to care for self | 21 | 15 | 5 | 2 | 3 | 1.72 | 32 | 2 |
| 74.Doesn’t feel sex. attractive | 27 | 6 | 5 | 2 | 3 | 2.13 | 31 | 0 |
| 76.Not interested in having sex | 24 | 5 | 8 | 4 | 2 | 2.16 | 28 | 2 |
| 81.Doesn’t follow MD’s instructions | 36 | 7 | 0 | 2 | 1 | 1.70 | 31 | 1 |
| 82.Financial problems | 39 | 4 | 2 | 1 | 0 | 1.57 | 31 | 2 |
| 83.Insurance problems | 41 | 4 | 1 | 0 | 0 | 1.20 | 31 | 2 |
| 84.Diff. with transport | 42 | 3 | 1 | 0 | 0 | 1.25 | 31 | 1 |
| 90.Diff help children cope c | 27 | 11 | 2 | 1 | 1 | 1.47 | 29 | 1 |
| 93.Diff. talk people at work c | 5 | 1 | 0 | 0 | 1 | 2.50 | 5 | 0 |
| 95.Diff. ask time off for treatments c | 4 | 2 | 0 | 1 | 0 | 1.67 | 6 | 0 |
| 96.Worried about being fired c | 5 | 2 | 0 | 0 | 0 | 1.00 | 5 | 0 |
| 97. Diff. finding new job c | 44 | 0 | 0 | 0 | 0 | - | 2 | 0 |
| 99.Frequency of sex decreased c | 1 | 1 | 5 | 0 | 1 | 2.14 | 9 | 1 |
| 103.Diff. talk feelings with partner c | 23 | 9 | 4 | 0 | 0 | 1.31 | 27 | 1 |
| 108.Diff. talk wills/financial matters with partner c | 26 | 4 | 4 | 1 | 0 | 1.67 | 25 | 0 |
| 109.Doesn’t feel like embrace. etc. partner c | 28 | 3 | 4 | 0 | 0 | 1.57 | 26 | 0 |
| 113.Not get along as well usual with partner c | 31 | 2 | 1 | 0 | 1 | 2.00 | 26 | 0 |
| 118.Partner provides too much care c | 19 | 10 | 4 | 1 | 1 | 1.56 | 25 | 0 |
| 120.Diff. ask partner to take care c | 22 | 8 | 3 | 1 | 1 | 1.62 | 25 | 1 |
| 121.Diff. initiating dates c | 1 | 1 | 2 | 0 | 2 | 2.60 | 5 | 1 |
| 124. Diff. tell date about cancer c | 2 | 0 | 2 | 0 | 2 | 3.00 | 5 | 0 |
| 126.Nervous get chemo c | 15 | 10 | 4 | 1 | 0 | 1.40 | 19 | 0 |
| 127.Nauseated during/before chemo c | 21 | 8 | 1 | 0 | 0 | 1.11 | 18 | 1 |
| 130.Nauseated after chemo c | 18 | 10 | 2 | 0 | 0 | 1.17 | 18 | 1 |
| 131.Vomit after chemo c | 28 | 2 | 0 | 0 | 0 | 1.00 | 21 | 0 |
| 133.Other side effect chemo c | 12 | 10 | 5 | 3 | 0 | 1.61 | 20 | 2 |
| 136.Nervous to get radiotherapy c | 3 | 5 | 1 | 0 | 0 | 1.17 | 10 | 0 |
| 137.Nauseous/vomit after radiotherapy c | 7 | 0 | 0 | 1 | 0 | 3.00 | 7 | 0 |
| 138.Problems ostomy care/maintenance c | 1 | 0 | 1 | 0 | 0 | 2.00 | 4 | 1 |
| 139.Diff. with prosthesis c | 3 | 1 | 1 | 0 | 0 | 1.50 | 4 | 0 |
| *Note:* QOL-score range of each item from 0 - 4: 0= Not at all, 1= A little, 2= A fair amount, 3= Much, 4= Very Much, on the question ‘Does this apply to you?’, Need for help-score is retrieved by the indication ‘Yes’ or ‘No’ on the question ‘Do you want help?’.  a Number of participants do not always count up to 46 due to missing values for some participants.  b Mean = mean problem severity in case a problem is experienced; No/Yes = participants answer on the question ‘Do you want help?’.  c Item not applicable for every participant. | | | | | | | | |

TABLE S2. Number of participants with problem rating and desire for help 3months post start of treatment (T1).

|  | **Patients’ problem rating and desire for help (N=43)a** | | | | | | | |
| --- | --- | --- | --- | --- | --- | --- | --- | --- |
| **CARES-SF items** | **0** | **1** | **2** | **3** | **4** | **Meanb** | **Nob** | **Yesb** |
| 1.Diff. bend or lift | 20 | 13 | 9 | 0 | 1 | 1.52 | 29 | 0 |
| 4.Reduction in energy | 2 | 12 | 19 | 4 | 5 | 2.05 | 30 | 2 |
| 6.Diff. household chores | 19 | 10 | 6 | 5 | 0 | 1.76 | 23 | 3 |
| 7.Diff. bathe. brush. groom | 35 | 6 | 1 | 0 | 0 | 1.14 | 27 | 0 |
| 12.Diff. planning active. | 11 | 21 | 4 | 4 | 2 | 1.58 | 25 | 5 |
| 13.Cannot gain weight | 22 | 6 | 6 | 4 | 5 | 2.38 | 24 | 3 |
| 85.Gain too much weight | 36 | 4 | 1 | 0 | 1 | 1.67 | 26 | 0 |
| 15.Food unappealing | 17 | 11 | 12 | 2 | 0 | 1.64 | 26 | 4 |
| 87.Fequent diarrhea | 25 | 7 | 6 | 1 | 3 | 2.00 | 24 | 3 |
| 88.Poor bladder control | 34 | 6 | 2 | 0 | 0 | 1.25 | 27 | 0 |
| 19.Cancer interferes work | 14 | 8 | 8 | 7 | 3 | 2.19 | 24 | 4 |
| 20.Frequently has pain | 27 | 9 | 4 | 2 | 0 | 1.53 | 26 | 1 |
| 25.Clothes not fit | 23 | 7 | 7 | 1 | 4 | 2.11 | 25 | 2 |
| 28.Doctors don’t explain what do | 37 | 1 | 2 | 1 | 0 | 2.00 | 27 | 0 |
| 30.Diff. ask doctors questions | 36 | 5 | 1 | 0 | 0 | 1.17 | 26 | 0 |
| 34.Diff. understand doctor about cancer | 36 | 4 | 1 | 0 | 0 | 1.20 | 24 | 2 |
| 36.Wants more control over doctor | 32 | 8 | 2 | 0 | 0 | 1.20 | 25 | 1 |
| 40.Uncomfor. with body changes | 12 | 16 | 7 | 3 | 4 | 1.83 | 23 | 4 |
| 41.Frequently anxious | 18 | 12 | 7 | 4 | 1 | 1.75 | 27 | 3 |
| 41b. Frequently lonely | 32 | 2 | 4 | 0 | 1 | 2.00 | 26 | 1 |
| 46.Diff. sleep | 19 | 10 | 11 | 1 | 1 | 1.70 | 26 | 3 |
| 47.Diff. concentrating | 18 | 10 | 8 | 4 | 1 | 1.83 | 23 | 4 |
| 54.Diff. ask frnd/rel. help | 19 | 11 | 10 | 2 | 0 | 1.61 | 24 | 2 |
| 55.Diff. tell frnd/rel. about cancer | 31 | 8 | 2 | 1 | 0 | 1.36 | 27 | 0 |
| 57.Frnd/rel. say look well when not | 23 | 13 | 4 | 2 | 0 | 1.42 | 26 | 1 |
| 60.Frnd/rel. do not visit enough | 35 | 4 | 2 | 0 | 0 | 1.33 | 25 | 1 |
| 63.Frnd/rel. diff. talk about cancer | 27 | 12 | 3 | 0 | 0 | 1.20 | 28 | 0 |
| 63b. Worry how loved ones are coping | 20 | 13 | 7 | 0 | 2 | 1.59 | 25 | 4 |
| 66.Nervous wait to see doctor | 18 | 17 | 4 | 3 | 0 | 1.42 | 26 | 2 |
| 69.Nervous get blood drawn | 30 | 7 | 3 | 1 | 0 | 1.45 | 27 | 0 |
| 71.Worry whether cancer progress | 5 | 18 | 10 | 4 | 5 | 1.89 | 26 | 3 |
| 72.Worry not able to care for self | 16 | 17 | 5 | 2 | 1 | 1.48 | 26 | 1 |
| 74.Doesn’t feel sex. attractive | 24 | 9 | 5 | 2 | 2 | 1.83 | 26 | 1 |
| 76.Not interested in having sex | 20 | 9 | 7 | 2 | 3 | 1.95 | 24 | 2 |
| 81.Doesn’t follow MD’s instructions | 35 | 4 | 1 | 1 | 1 | 1.86 | 26 | 0 |
| 82.Financial problems | 34 | 6 | 1 | 0 | 0 | 1.14 | 26 | 1 |
| 83.Insurance problems | 38 | 0 | 2 | 0 | 0 | 2.00 | 26 | 1 |
| 84.Diff. with transport | 37 | 4 | 0 | 0 | 0 | 1.00 | 26 | 0 |
| 90.Diff help children cope c | 22 | 9 | 3 | 1 | 0 | 1.38 | 23 | 2 |
| 93.Diff. talk people at work c | 4 | 1 | 0 | 0 | 0 | 1.00 | 3 | 0 |
| 95.Diff. ask time off for treatments c | 5 | 0 | 0 | 0 | 0 | 0.00 | 2 | 0 |
| 96.Worried about being fired c | 5 | 0 | 0 | 0 | 0 | 0.00 | 3 | 0 |
| 97. Diff. finding new job c | 1 | 0 | 0 | 0 | 0 | 0.00 | 2 | 0 |
| 99.Frequency of sex decreased c | 0 | 2 | 5 | 4 | 0 | 2.18 | 7 | 0 |
| 103.Diff. talk feelings with partner c | 21 | 6 | 5 | 0 | 0 | 1.45 | 21 | 2 |
| 108.Diff. talk wills/financial matters with partner c | 20 | 5 | 5 | 2 | 0 | 1.75 | 21 | 0 |
| 109.Doesn’t feel like embrace. etc. partner c | 22 | 7 | 1 | 0 | 1 | 1.44 | 20 | 0 |
| 113.Not get along as well usual with partner c | 24 | 2 | 3 | 1 | 2 | 2.38 | 19 | 2 |
| 118.Partner provides too much care c | 20 | 5 | 6 | 1 | 0 | 1.67 | 19 | 1 |
| 120.Diff. ask partner to take care c | 18 | 8 | 5 | 1 | 0 | 1.50 | 21 | 1 |
| 121.Diff. initiating dates c | 1 | 2 | 0 | 1 | 1 | 2.25 | 4 | 0 |
| 124. Diff. tell date about cancer c | 2 | 1 | 0 | 3 | 0 | 2.50 | 4 | 0 |
| 126.Nervous get chemo c | 13 | 10 | 3 | 1 | 2 | 1.69 | 15 | 2 |
| 127.Nauseated during/before chemo c | 15 | 9 | 0 | 2 | 1 | 1.58 | 18 | 0 |
| 130.Nauseated after chemo c | 14 | 6 | 4 | 1 | 2 | 1.92 | 15 | 3 |
| 131.Vomit after chemo c | 25 | 0 | 2 | 0 | 1 | 2.67 | 17 | 0 |
| 133.Other side effect chemo c | 7 | 6 | 5 | 6 | 2 | 2.21 | 19 | 1 |
| 136.Nervous to get radiotherapy c | 1 | 1 | 0 | 0 | 0 | 1.00 | 4 | 1 |
| 137.Nauseous/vomit after radiotherapy c | 4 | 0 | 0 | 0 | 0 | 0.00 | 2 | 0 |
| 138.Problems ostomy care/maintenance c | 2 | 0 | 1 | 0 | 0 | 2.00 | 4 | 0 |
| 139.Diff. with prosthesis c | 1 | 0 | 0 | 0 | 0 | 0.00 | 3 | 0 |
| *Note:* QOL-score range of each item from 0 - 4: 0= Not at all. 1= A little. 2= A fair amount. 3= Much. 4= Very Much. on the question ‘Does this apply to you?’. Need for help-score is retrieved by the indication ‘Yes’ or ‘No’ on the question ‘Do you want help?’.  a Number of participants do not always count up to 43 due to missing values for some participants.  b Mean = mean problem severity in case a problem is experienced; No/Yes = participants answer on the question ‘Do you want help?’.  c Item not applicable for every participant. | | | | | | | | |
